# Supplementary material
Source: PubMed Central journal article supplement (PMC8266417)
Supplement: NIHMS1707529-supplement-supinfo.pdf [file NIHMS1707529-supplement-supinfo.pdf]

**Supplemental Table 1. Adverse Events in *HRAS*-mutant salivary cancer patients treated with tipifarnib**

| <b>Adverse Event</b> | <b>All grades (%)<sup>a</sup></b> | <b>Grade 3-4 (%)</b> |
|----------------------|-----------------------------------|----------------------|
| Hematologic          |                                   |                      |
| Neutropenia          | 5 (38)                            | 4 (31)               |
| Anemia               | 4 (31)                            | 3 (23)               |
| Thrombocytopenia     | 2 (15)                            | 1 (8)                |
| Gastrointestinal     |                                   |                      |
| Stomatitis           | 0                                 | 0                    |
| Nausea               | 5 (38)                            | 1 (8)                |
| Vomiting             | 2 (15)                            | 0                    |
| Dyspepsia            | 1 (8)                             | 0                    |
| Diarrhea             | 0                                 | 0                    |
| Genitourinary        |                                   |                      |
| Elevated creatinine  | 2 (15)                            | 2 (15)               |
| Respiratory          |                                   |                      |
| Pneumonitis          | 0                                 | 0                    |

<sup>a</sup> reported based on CTCAE (Common Terminology Criteria for Adverse Events) version 4.0
